# Supplementary material for: Combined hydrophilic interaction liquid chromatography-scanning field asymmetric waveform ion mobility spectrometry-time-of-flight mass spectrometry for untargeted metabolomics
Source: PubMed Central journal article supplement (PMC6718375; doi:10.1007/s00216-019-01790-6), 2019-04-23
Supplement: 216_2019_1790_MOESM1_ESM.pdf [file 216_2019_1790_MOESM1_ESM.pdf]

**Analytical and Bioanalytical Chemistry**

**Electronic Supplementary Material**

**Combined hydrophilic interaction liquid chromatography-scanning field asymmetric waveform ion mobility spectrometry-time-of-flight mass spectrometry for untargeted metabolomics**

Katarzyna M. Szykuła, Joris Meurs, Matthew A. Turner, Colin S. Creaser,  
James C. Reynolds

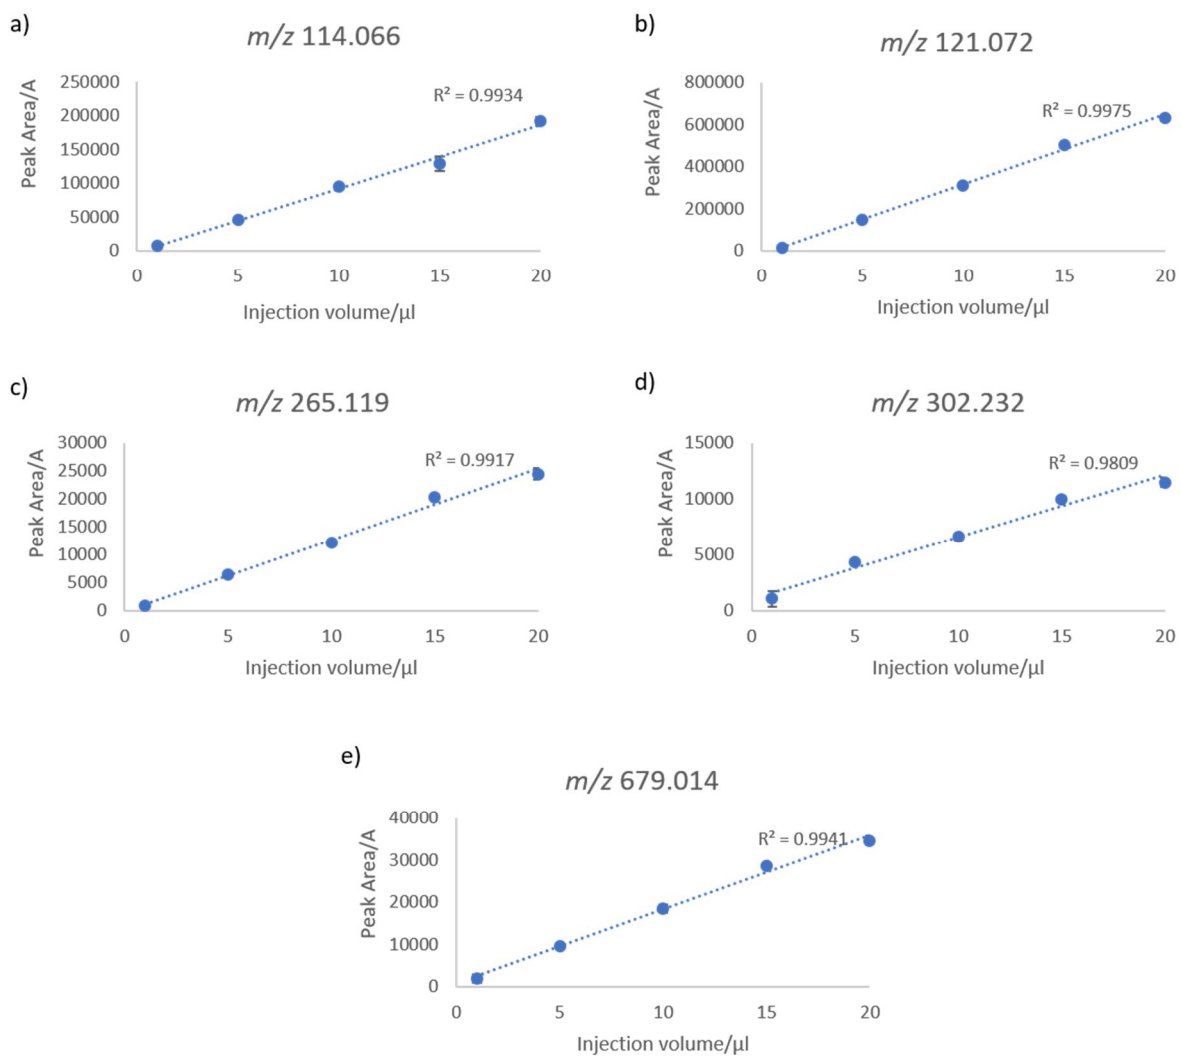

**Fig. S1** Calibration graphs for selected ions for pooled urine sample. Injection volume range 1 – 20  $\mu\text{l}$  in triplicates

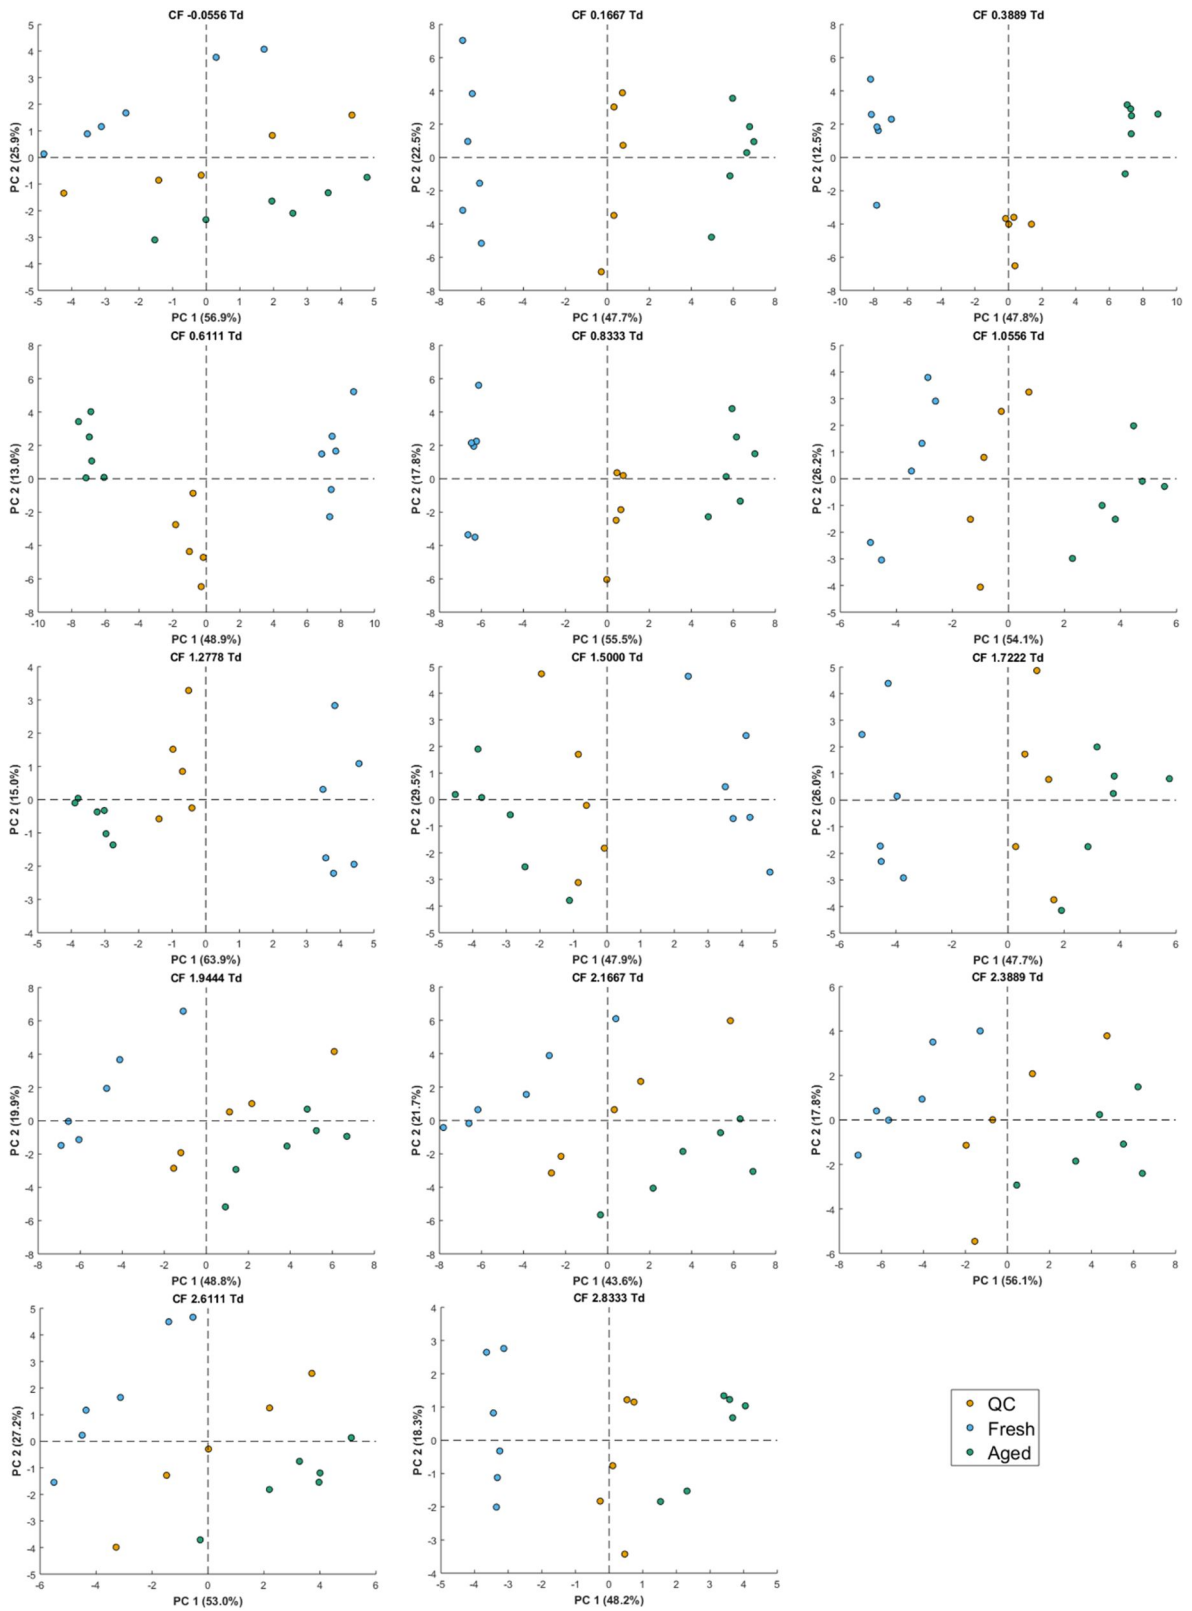

**Fig. S2** PCA plots of urine samples containing fresh (blue), aged (green) and quality control samples (orange) at selected CF values

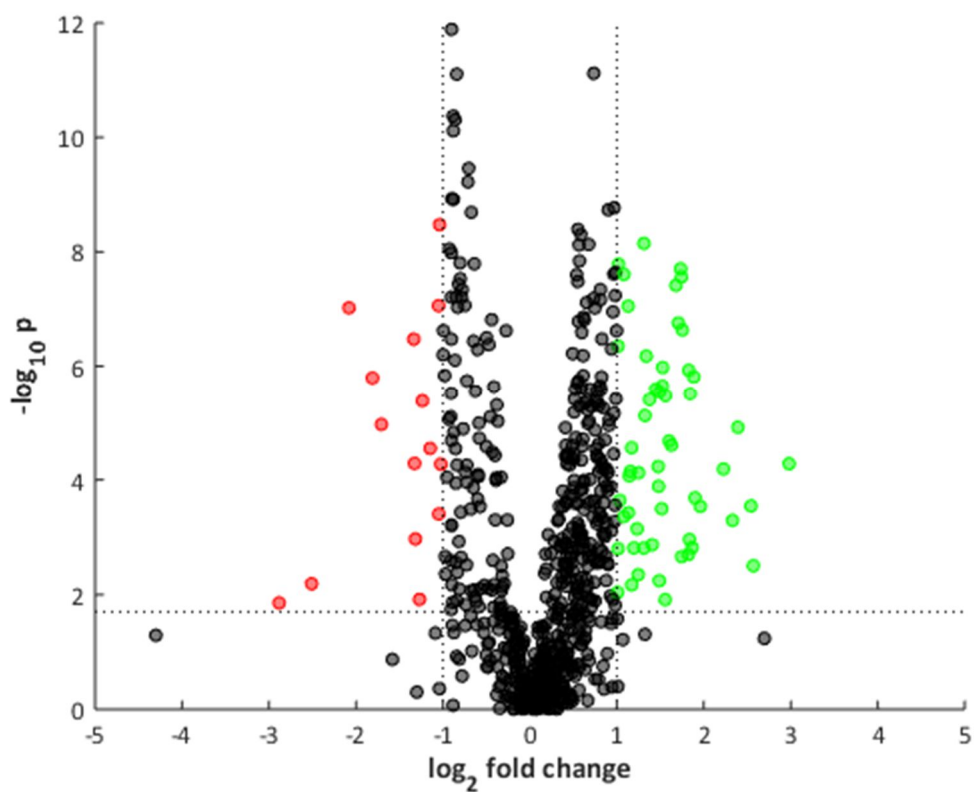

**Fig. S3** Volcano plot of urine samples presenting ions with significant change in abundance between fresh and aged urine samples

**Table S1** Ions with significant and at least two-fold change in abundance between fresh and aged urine samples

| Mass measured | Retention time [min] | Median Fold change | p-value   | 0.011 | CF (Td) |
|---------------|----------------------|--------------------|-----------|-------|---------|
| 104.1943      | 9.02                 | 3.04               | 2.08E-05  | 0.014 | 0.39    |
| 108.081       | 8.02                 | 3.57               | 1.1E-03   | 0.018 | -0.28   |
| 110.055       | 6.54                 | 2.29               | 1.5E-03   | 0.038 | -0.06   |
| 114.0664      | 3.41                 | 2.80               | 5.7E-03   | 0.007 | 0.83    |
| 116.1074      | 5.16                 | 2.05               | 2.2E-04   | 0.029 | -0.28   |
| 121.0718      | 1.55                 | 3.54               | 2.0E-03   | 0.005 | 0.83    |
| 121.1644      | 1.55                 | 3.59               | 3.11E-06  | 0.009 | -0.28   |
| 124.0723      | 5.28                 | 3.09               | 2.47E-05  | 0.007 | -0.06   |
| 131.1174      | 8.32                 | 5.25               | 1.21E-05  | 0.020 | -0.06   |
| 136.0395      | 1.94                 | 2.01               | 9.1E-03   | 0.036 | 0.17    |
| 151.1444      | 8.75                 | 2.37               | 4.5E-03   | 0.008 | 0.83    |
| 156.0777      | 8.10                 | 0.42               | 4.13E-06  | 0.009 | 0.39    |
| 157.0611      | 8.40                 | 0.31               | 1.07E-05  | 0.004 | 0.39    |
| 160.0967      | 7.65                 | 0.48               | 8.79E-08  | 0.021 | 0.17    |
| 162.1119      | 8.18                 | 0.41               | 1.2E-02   | 0.017 | 1.94    |
| 166.0723      | 2.95                 | 2.23               | 7.11E-05  | 0.001 | 1.50    |
| 167.0571      | 1.25                 | 2.12               | 2.48 E-08 | 0.006 | 1.94    |
| 181.0722      | 0.99                 | 2.59               | 3.93E-06  | 0.008 | 2.17    |
| 185.1281      | 2.41                 | 2.94               | 3.70E-06  | 0.014 | 2.61    |
| 191.1773      | 8.67                 | 2.38               | 7.47E-05  | 0.019 | 0.83    |
| 196.0962      | 1.54                 | 3.35               | 2.2E-03   | 0.011 | -0.06   |
| 203.1468      | 7.94                 | 0.49               | 5.31E-05  | 0.002 | -0.06   |
| 207.1095      | 2.41                 | 3.69               | 1.54E-06  | 0.023 | 2.17    |
| 212.0928      | 5.97                 | 0.17               | 6.4E-03   | 0.022 | -0.06   |
| 218.0213      | 3.38                 | 0.13               | 1.4E-02   | 0.015 | 0.17    |
| 227.1264      | 3.41                 | 2.19               | 8.94E-08  | 0.002 | 1.06    |
| 227.1789      | 7.96                 | 2.48               | 7.12E-09  | 0.018 | -0.28   |
| 229.1628      | 7.44                 | 0.40               | 5.15E-05  | 0.010 | 2.61    |
| 229.2843      | 7.41                 | 0.45               | 2.82E-05  | 0.004 | 0.17    |
| 231.2002      | 8.61                 | 2.02               | 4.47E-07  | 0.014 | 0.61    |
| 241.1547      | 7.58                 | 0.48               | 3.9E-04   | 0.003 | 0.39    |
| 247.0956      | 1.54                 | 2.03               | 1.65E-08  | 0.003 | 0.17    |
| 247.1461      | 5.26                 | 2.53               | 6.66E-07  | 0.007 | -0.06   |
| 248.1454      | 7.84                 | 0.40               | 3.37E-07  | 0.002 | 0.17    |
| 257.1155      | 2.41                 | 2.88               | 1.06E-06  | 0.001 | 1.94    |
| 262.1305      | 8.45                 | 0.49               | 3.36E-09  | 0.013 | 0.17    |
| 269.1204      | 1.43                 | 2.35               | 7.15E-04  | 0.010 | 1.94    |
| 283.1050      | 2.19                 | 2.19               | 3.74E-04  | 0.018 | 1.72    |
| 286.1029      | 1.99                 | 0.40               | 1.07E-03  | 0.012 | 0.39    |
| 286.2034      | 5.62                 | 2.21               | 8.50E-05  | 0.018 | 2.17    |

|           |       |      |           |       |      |
|-----------|-------|------|-----------|-------|------|
| 287.1024  | 4.04  | 2.02 | 1.58E-03  | 0.005 | 1.94 |
| 290.1623  | 8.50  | 0.24 | 9.53 E-08 | 0.008 | 0.17 |
| 298.1145  | 2.62  | 7.89 | 5.20E-05  | 0.019 | 1.94 |
| 300.2018  | 2.62  | 2.65 | 1.35E-03  | 0.004 | 2.39 |
| 300.2176  | 5.32  | 2.81 | 2.87E-06  | 0.011 | 2.39 |
| 302.2028  | 5.36  | 2.78 | 5.86E-05  | 0.015 | 2.39 |
| 302.2331  | 4.99  | 2.86 | 3.19E-04  | 0.010 | 2.17 |
| 310.2031  | 5.41  | 3.73 | 2.05E-04  | 0.001 | 1.94 |
| 312.1335  | 2.85  | 3.20 | 3.85E-08  | 0.013 | 2.17 |
| 312.2202  | 5.51  | 4.68 | 6.43E-05  | 0.028 | 2.39 |
| 330.2343  | 5.91  | 2.94 | 1.22E-02  | 0.011 | 0.61 |
| 344.2331  | 2.99  | 2.50 | 7.50E-06  | 0.018 | 2.83 |
| 358.2600  | 5.44  | 5.03 | 5.08E-04  | 0.009 | 2.17 |
| 378.1819  | 4.03  | 2.25 | 2.75E-05  | 0.022 | 2.39 |
| 388.2567  | 3.25  | 3.89 | 2.90E-04  | 0.002 | 2.83 |
| 391.2341  | 2.40  | 3.35 | 2.73E-08  | 0.009 | 2.39 |
| 441.2404  | 2.40  | 2.79 | 1.29E-04  | 0.004 | 1.94 |
| 451.1645  | 2.723 | 2.73 | 2.55E-06  | 0.006 | 1.94 |
| 476.3110  | 3.72  | 3.33 | 1.98E-08  | 0.007 | 2.83 |
| 515.2209  | 2.79  | 2.87 | 2.24E-06  | 0.023 | 1.50 |
| 529.2289  | 4.01  | 5.94 | 3.14E-03  | 0.003 | 2.17 |
| 550.2043  | 2.20  | 3.55 | 1.17E-06  | 0.002 | 1.94 |
| 565.2099  | 2.20  | 3.27 | 1.76E-07  | 0.016 | 1.72 |
| 576.1310  | 3.37  | 2.48 | 1.55E-03  | 0.021 | 1.94 |
| 576.1669  | 3.42  | 2.25 | 6.76E-03  | 0.013 | 1.72 |
| 586.1524  | 4.02  | 3.64 | 1.51E-03  | 0.016 | 1.72 |
| 597.0168  | 6.10  | 2.11 | 4.35E-04  | 0.009 | 2.17 |
| 850.2716  | 4.01  | 5.82 | 2.83E-04  | 0.006 | 1.72 |
| 909.5473  | 4.37  | 3.37 | 2.32E-07  | 0.022 | 1.50 |
| 1194.1103 | 1.11  | 0.28 | 1.61E-06  | 0.011 | 1.06 |
